# Supplementary material for: Multistability and regime shifts in microbial communities explained by competition for essential nutrients
Source: eLife. 2019 Nov 22;8:e49720. doi: 10.7554/eLife.49720 (PMC6874476; doi:10.7554/eLife.49720)
Supplement: Supplementary file 1. [file elife-49720-supp1.xlsx]

## Sheet: Sheet1
Values of species' competitive abilities for carbon and nitrogen in 2C x 2N x 4S model.
	λc		λn
	N1	N2	N1	N1
C1	41	35	16	50
C2	52	56	27	44
