# Supplementary material for: Multistability and regime shifts in microbial communities explained by competition for essential nutrients
Source: eLife. 2019 Nov 22;8:e49720. doi: 10.7554/eLife.49720 (PMC6874476; doi:10.7554/eLife.49720)
Supplement: Supplementary file 2. [file elife-49720-supp2.xlsx]

## Sheet: Sheet1
Values of species' carbon and nitrogen yields in 2C x 2N x 4S model.
	Yc		Yn
	N1	N2	N1	N1
C1	0.37	0.64	0.27	0.1
C2	0.47	0.14	0.22	0.59
