# Supplementary material for: Multistability and regime shifts in microbial communities explained by competition for essential nutrients
Source: eLife. 2019 Nov 22;8:e49720. doi: 10.7554/eLife.49720 (PMC6874476; doi:10.7554/eLife.49720)
Supplement: Supplementary file 6. [file elife-49720-supp6.xlsx]

## Sheet: Sheet1
Values of species' nitrogen yields in 6C x 6N x 36S model.
	N1	N2	N3	N4	N5	N6
C1	0.1	0.3	0.67	0.36	0.32	0.66
C2	0.83	0.3	0.47	0.3	0.4	0.58
C3	0.72	0.15	0.65	0.54	0.21	0.18
C4	0.3	0.22	0.84	0.64	0.29	0.56
C5	0.55	0.16	0.77	0.42	0.22	0.25
C6	0.49	0.67	0.89	0.8	0.5	0.19
